# Supplementary material for: Single-Cell Sequencing Reveals an Intrinsic Heterogeneity of the Preovulatory Follicular Microenvironment
Source: MDPI journal article supplement (doi:10.3390/biom12020231), 2022-01-29
Supplement: s1 [file s1]

**Table S1 The characteristic and clinical outcomes of patients**

|                             | <b>Patient 1</b> | <b>Patient 2</b> | <b>Patient 3</b> | <b>Patient 4</b> | <b>Patient 5</b> | <b>Patient 6</b> |
|-----------------------------|------------------|------------------|------------------|------------------|------------------|------------------|
| Age                         | 27               | 34               | 31               | 23               | 33               | 30               |
| protocol                    | GnRH-a           | GnRH-ant         | GnRH-ant         | GnRH-ant         | GnRH-ant         | GnRH-a           |
| Total Gn dose (IU)          | 1500             | 1000             | 2075             | 1802.5           | 2150             | 1525             |
| Days of Gn stimulation      | 10               | 8                | 13               | 15               | 9                | 12               |
| Trigger                     | Ovidrel          | Decapeptyl+ HCG  | Decapeptyl+ HCG  | Decapeptyl+ HCG  | Ovidrel          | Ovidrel          |
| P on HCG day (ng/ml)        | 0.75             | 1.16             | 0.88             | 0.62             | 0.41             | 0.7              |
| LH on HCG day (mIU/ml)      | 0.24             | 1.1              | 0.95             | 1.57             | 2.37             | 0.59             |
| E2 on HCG day (pg/ml)       | 1568             | 2416             | 2800             | 1159             | 2626             | 4334             |
| P after HCG day (ng/ml)     | 10.48            | 11.28            | 11.56            | 2.05             | 2.83             | -                |
| LH after HCG day (mIU/ml)   | -                | 20.62            | 38.26            | 22.45            | -                | -                |
| HCG after HCG day (IU/L)    | 97.25            | 90.62            | 68.26            | 47.32            | 57.02            | 141.88           |
| E2 after HCG day (pg/ml)    | 1885             | 2941             | 2629             | 1849             | 4734             | 3939             |
| oocyte                      | MII              | MII              | MII              | MII              | MII              | MII              |
| Embryo score <sup>[1]</sup> | 1 cell stage     | 3BB              | 3BB              | 4BB              | 332              | 4BB              |

Abbreviations: Gn, gonadotropin; P, progesterone; HCG, human chorionic gonadotropin; LH, luteinizing hormone; E2, estrodial; GnRH-a: gonadotropin releasing hormone agonist; GnRH-ant: gonadotropin releasing hormone antagonist; MII: meiosis II stage.

<sup>[1]</sup> High quality embryo was defined as embryos with 7-9 cells and <30% fragmentation on day 3 or blastocysts meet or exceed 3BB by Gardner score

Blanks indicate that the patient did not take the indicated tests.

**Table S2 The sequencing results of each sample before and after quality control**

|                        | Patient 1 | Patient 2 | Patient 3 | Patient 4 | Patient 5 | Patient 6 |
|------------------------|-----------|-----------|-----------|-----------|-----------|-----------|
| Before quality control |           |           |           |           |           |           |
| Cell number            | 1786      | 739       | 3246      | 3544      | 3671      | 2879      |
| Cell viability(%)      | 85.00     | 95.00     | 95.00     | 68.00     | 83.50     | 79.24     |
| Mean reads per cell    | 127265    | 112733    | 129462    | 155119    | 116171    | 111277    |
| median UMI             | 3982      | 3941      | 2434.5    | 7289      | 9026      | 11975     |
| median gene            | 1602.5    | 1463      | 1165      | 2390      | 2905      | 3327      |
| percent.mt >20%(%)     | 2.184     | 12.855    | 0.062     | 1.044     | 0.899     | 1.806     |
| percent.mt >50%(%)     | 0.504     | 2.571     | 0         | 0.056     | 0         | 0.139     |
| After quality control  |           |           |           |           |           |           |
| Cell number            | 1712      | 705       | 3013      | 3414      | 3307      | 2441      |
| median UMI             | 3928      | 4028      | 2408      | 7097      | 8298      | 10431     |
| median gene            | 1588.5    | 1519      | 1150      | 2345      | 2770      | 3089      |
| percent.mt >20%(%)     | 1.752     | 10.638    | 0.067     | 1.025     | 0.998     | 1.925     |
| percent.mt >50%(%)     | 0         | 0         | 0         | 0         | 0         | 0         |

**Table S3 Numbers of different cell type for each sample**

|                  | Patient 1 | Patient 2 | Patient 3 | Patient 4 | Patient 5 | Patient 6 |
|------------------|-----------|-----------|-----------|-----------|-----------|-----------|
| GCs              | 334       | 218       | 281       | 3286      | 3263      | 2232      |
| Macrophages      | 937       | 200       | 2301      | 35        | 2         | 126       |
| DCs              | 180       | 171       | 329       | 7         | 6         | 61        |
| T cells          | 144       | 34        | 58        | 5         | 9         | 10        |
| Neutrophils      | 112       | 5         | 44        | 4         | 1         | 2         |
| Epithelial cells | 5         | 77        | 0         | 77        | 26        | 10        |

Abbreviations: GCs, granulosa cells; DCs, dendritic cells.

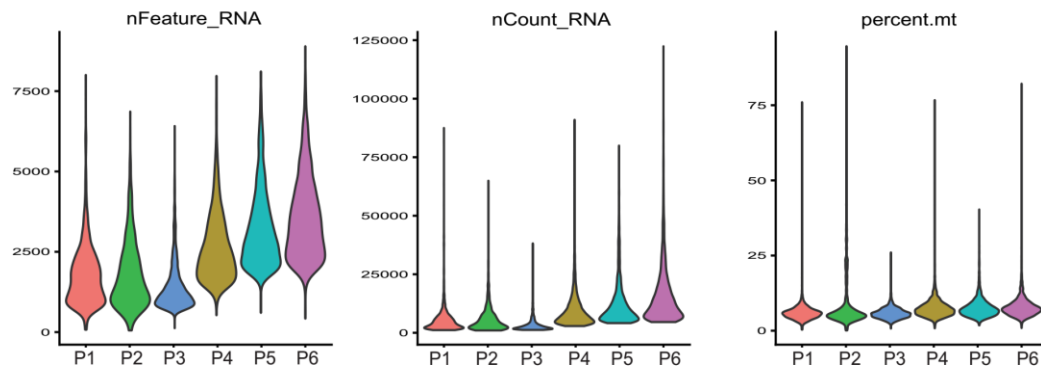

Supplementary Figure S1 Violin plots showing the number of genes, the number of UMI and the percentage of mitochondrial gene filter by samples.

A

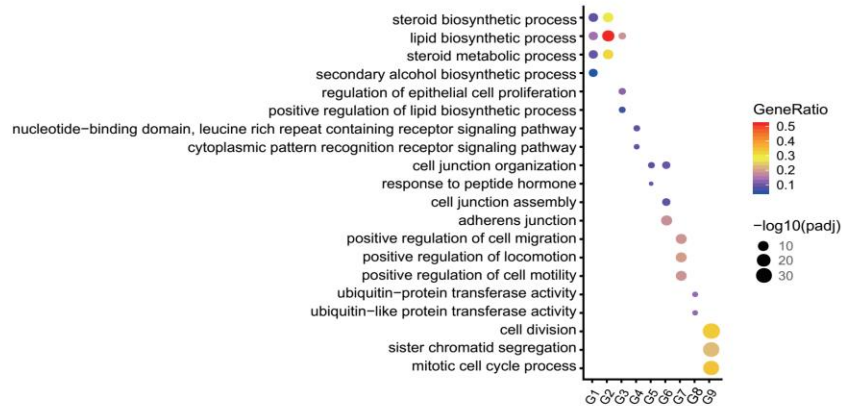

B

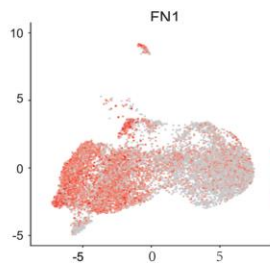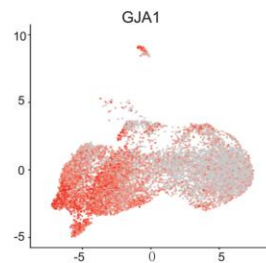

C

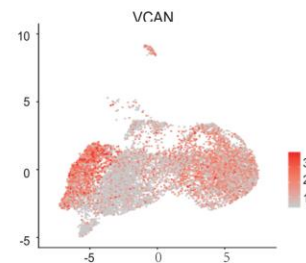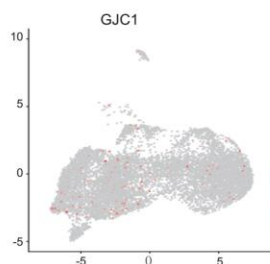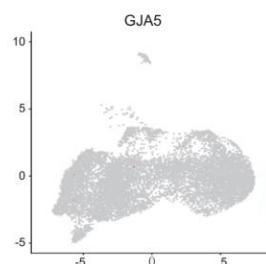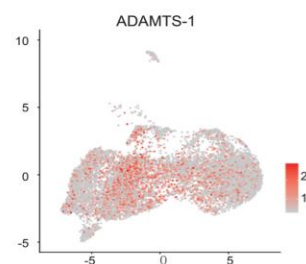

D

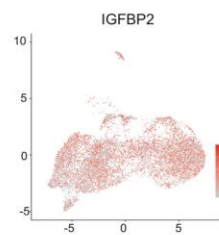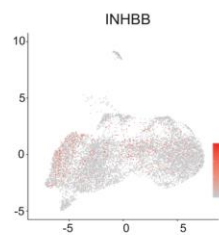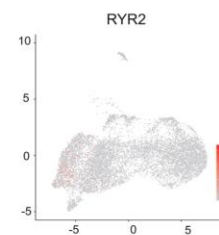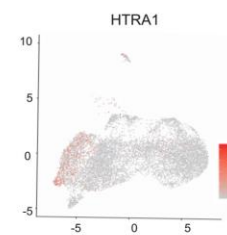

Supplementary Figure S2 (A) Representative GO terms enriched in the nine clusters in GCs

(B) UMAP plot showing the expression patterns of GJA1, FN1, GJC1 and GJA5 in GCs. (C)

UMAP plot showing the exclusive expression patterns of VCAN and ADAMTS1 in GCs. Cells

in (B) and (C) are colored with the expression levels of the indicated genes, with a gradient

from gray to red indicating the lowest to the highest gene expression level. (D) UMAP plot showing the expression of marker genes of CCs and MGCs.

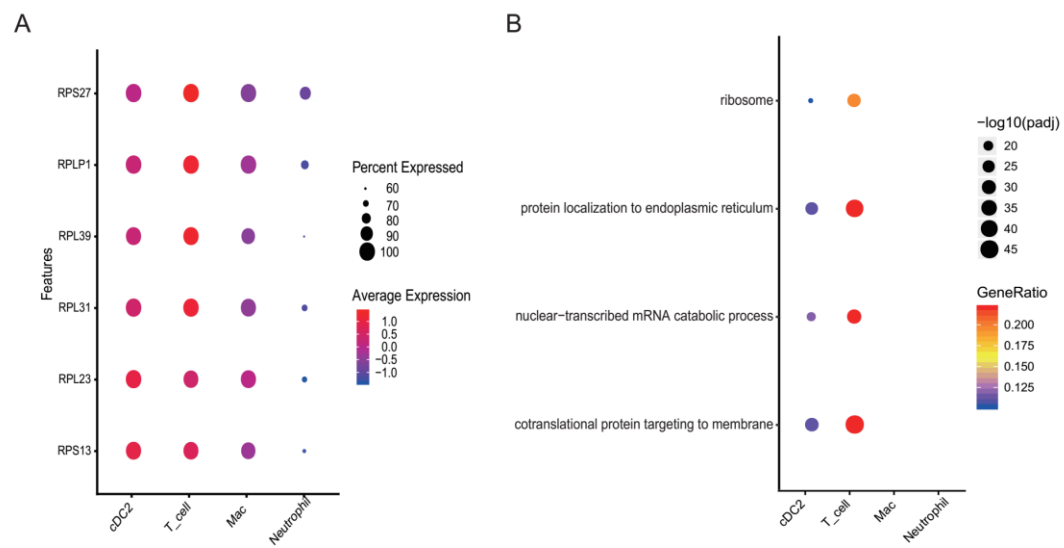

Supplementary Figure S3(A) Violin plots showing the expression levels of highly expressed genes in DCs and T cells. (B) Representative GO terms enriched in DCs and T cells.
